# Supplementary material for: Perfluorocarbon-loaded polydopamine nanoparticles as ultrasound contrast agents
Source: Royal Society of Chemistry journal article supplement (doi:10.1039/c8nr02605j), 2018-01-01
Supplement: c8nr02605j1.pdf [file c8nr02605j1.pdf]

## Supporting Information

### **Perfluorocarbon-loaded polydopamine nanoparticles as ultrasound contrast agents**

Yijun Xie,<sup>a,b</sup> James Wang,<sup>a,c</sup> Zhao Wang,<sup>a,d</sup> Kelsey A. Krug,<sup>a</sup> and Jeffrey D. Rinehart <sup>\*a,b</sup>

<sup>a</sup> Department of Chemistry and Biochemistry, University of California, San Diego, La Jolla, CA 92093, USA.

<sup>b</sup> Materials Science and Engineering Program, University of California, San Diego, La Jolla, CA 92093, USA.

<sup>c</sup> Department of NanoEngineering, University of California, San Diego, La Jolla, CA 92093, USA.

<sup>d</sup> Department of Chemistry, Northwestern University, Evanston, IL 60208, USA

#### **Corresponding author**

\*Email: [jrinehart@ucsd.edu](mailto:jrinehart@ucsd.edu)

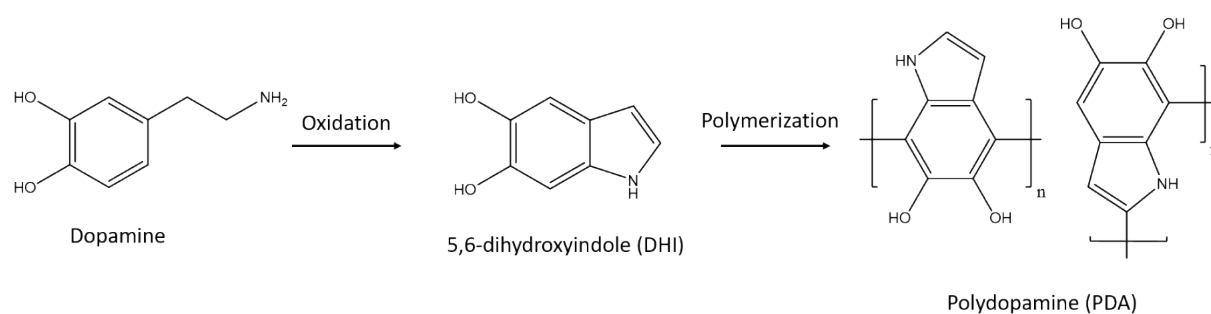

**Scheme S1.** Generalized representation of dopamine oxidative polymerization to form polydopamine (PDA). Multiple polymerization sites and protonation states create a highly-conjugated material similar to natural eumelanin.

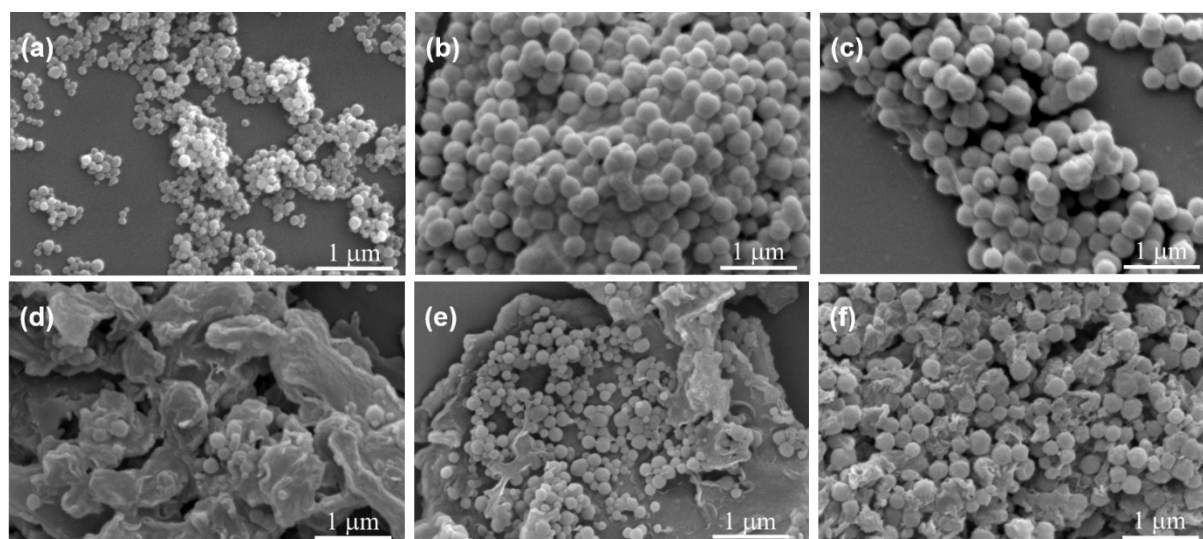

**Fig. S1** SEM images of (a) PDA-74, (b) PDA-174, (c) PDA-350, (d) PDA-41-F, (e) PDA-135-F, and (f) PDA-242-F.

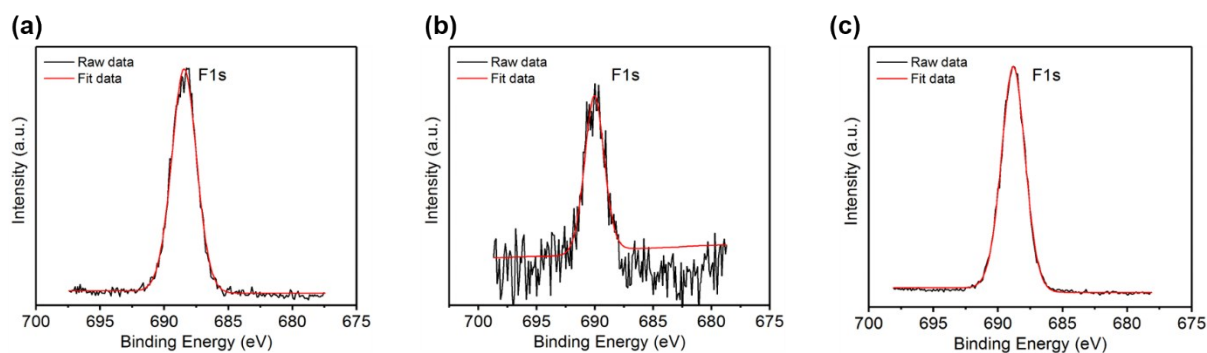

**Fig. S2** F1s XPS spectra of (a) PDA-41-F, (b) PDA-135-F, and (c) PDA-242-F.

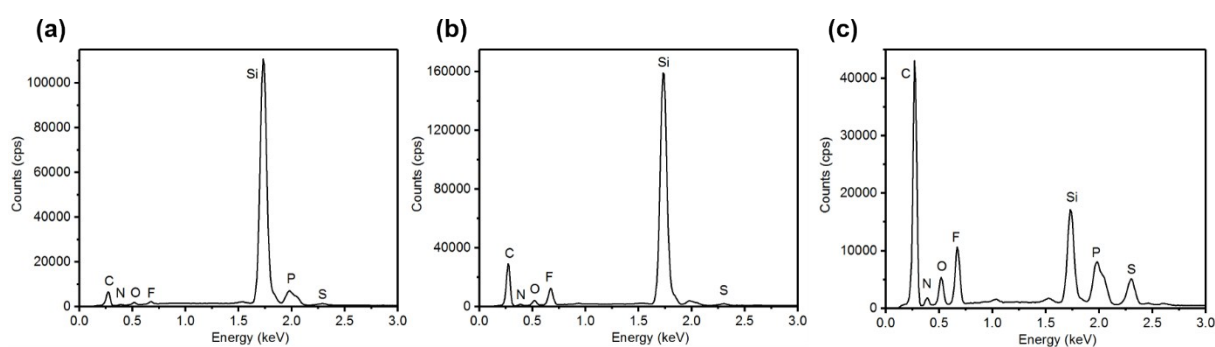

**Fig. S3** EDS spectrum of (a) PDA-41-F, (b) PDA-135-F, and (c) PDA-242-F.

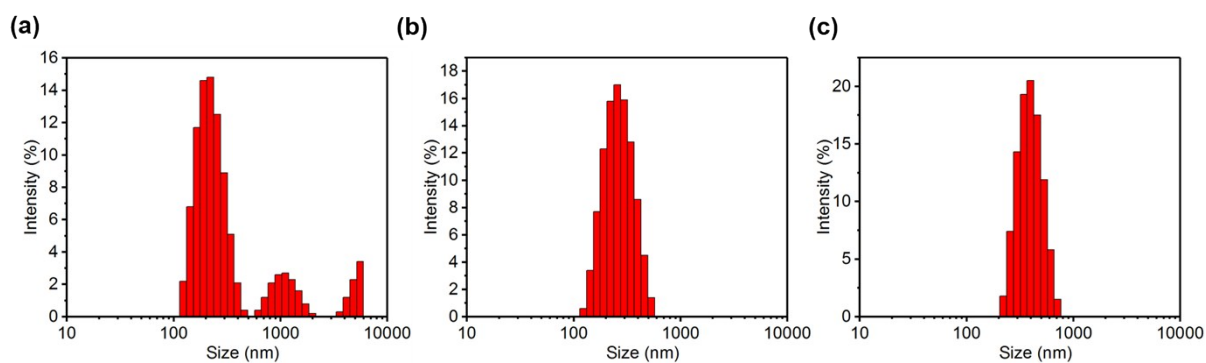

**Fig. S4** DLS size distributions of (a) PDA-41-F, (b) PDA-135-F, and (c) PDA-242-F.

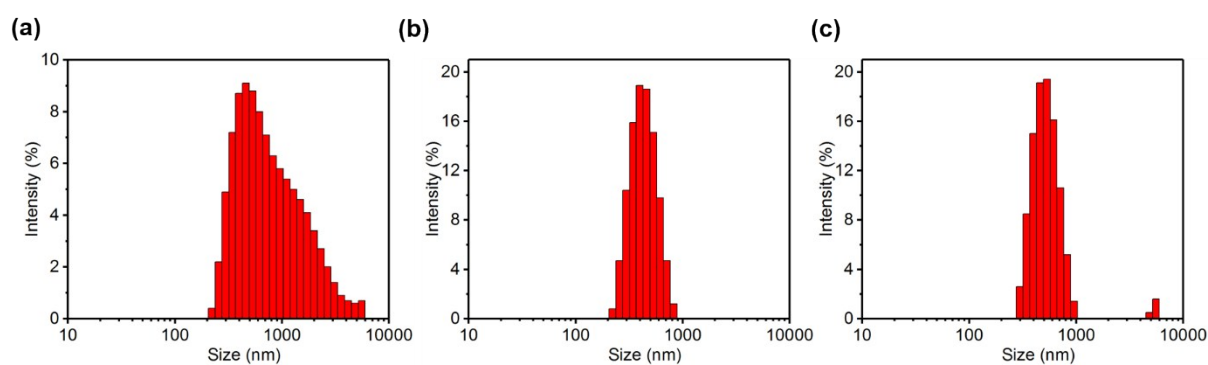

**Fig. S5** DLS size distributions of PFP-loaded (a) PDA-41-F, (b) PDA-135-F, and (c) PDA-242-F.

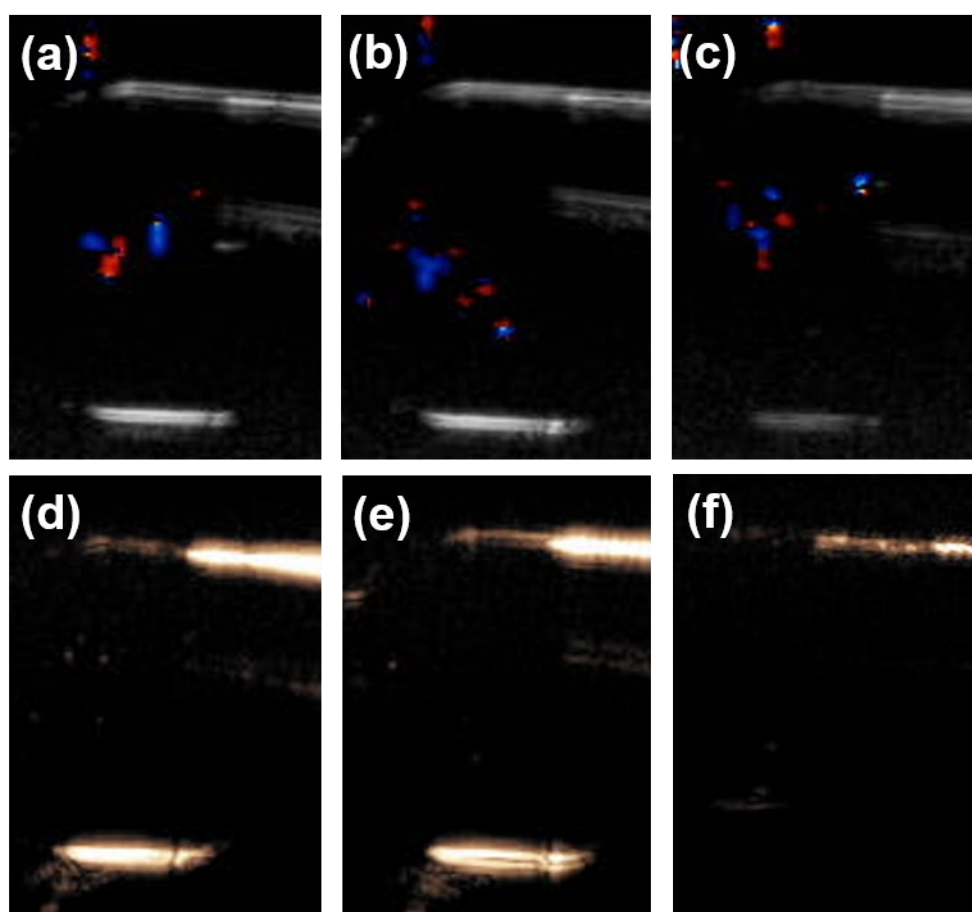

**Fig. S6** Color Doppler imaging of (a) PDA-74, (b) PDA-174, and (c) PDA-350; CPS imaging of (d) PDA-74, (e) PDA-174, and (f) PDA-350 at MI=1.9 in aqueous solution without PFP treatment.

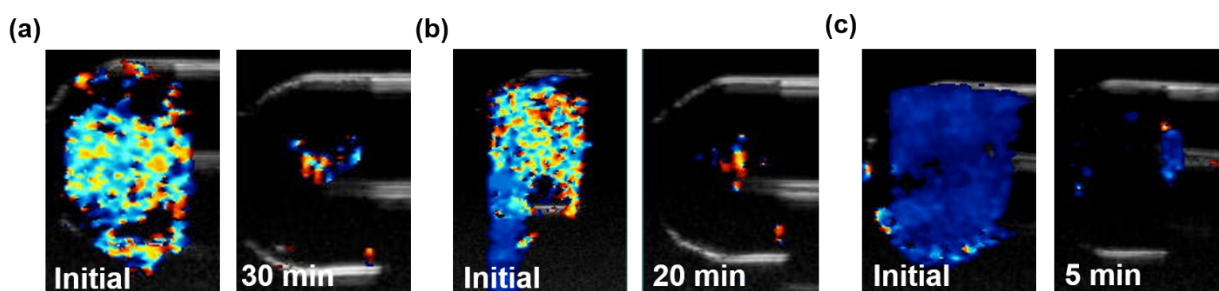

**Fig. S7** Color Doppler signal detected at (a) 0 min and 30 min for PDA-41-F, (b) 0 min and 20 min for PDA-242-F, and (c) 0 min and 5 min for commercial Definity contrast agents at MI=1.9.

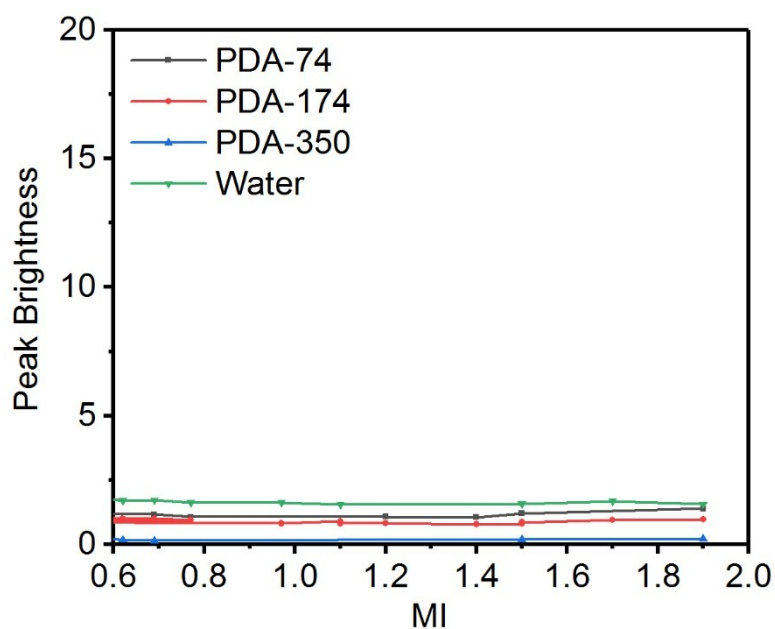

**Fig. S8** Quantitative plot of brightness on CPS imaging versus MI for (a) PDA-74, (b) PDA-174, and (c) PDA-350 in aqueous solution without PFP treatment.

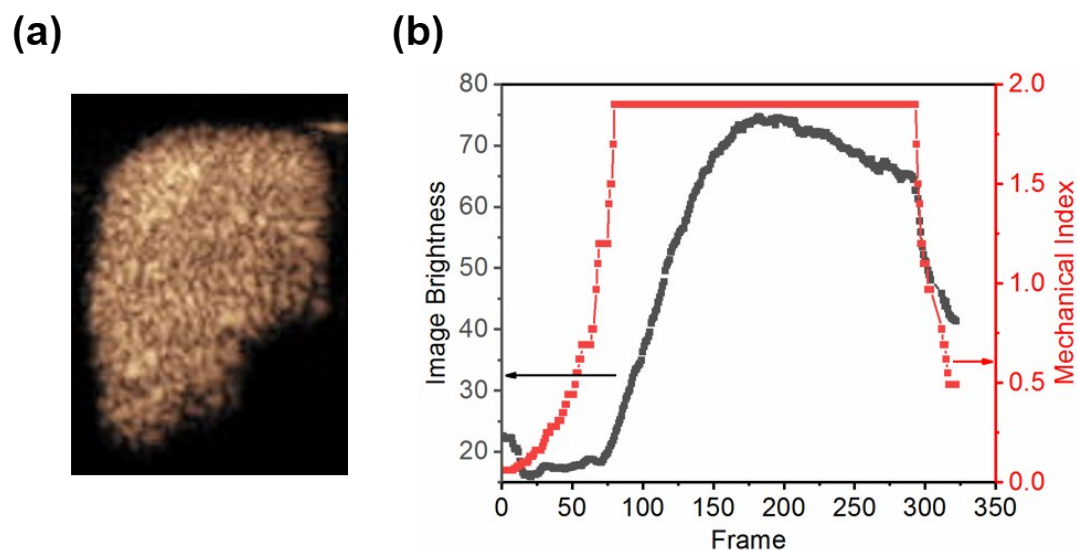

**Fig. S9** (a) CPS imaging, and (b) quantitative average pixel brightness and MI for CPS imaging of the commercial contrast agent Definity.

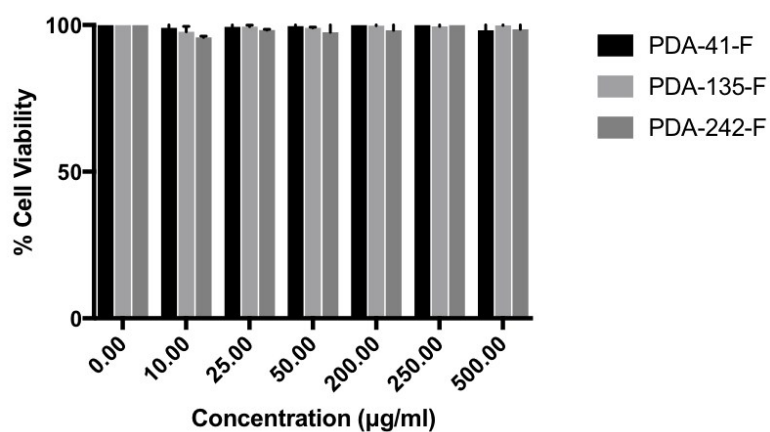

**Fig. S10** Cell viability of HCT116 cells after incubation with different concentrations of PDA-41-F, PDA-135-F, and PDA-242-F for 24 h.
